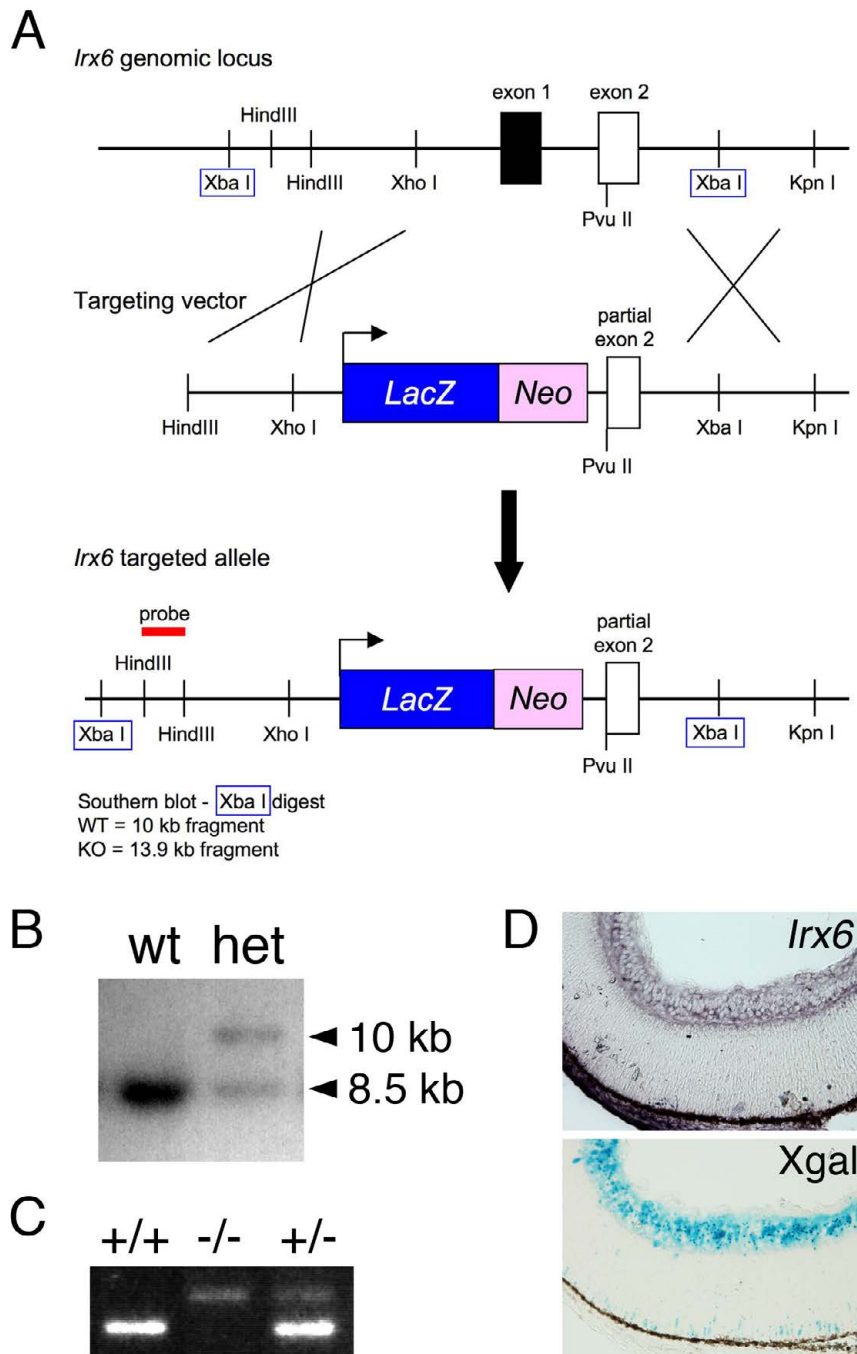

**Fig. S1. Targeted disruption of *Irx6*.** A 5.5 kb *Nco*I/*Hind*III *Irx6* fragment was cloned as the 5' arm of the targeting construct upstream of the *lacZ* gene. The targeting construct contained a neomycin resistance cassette and a thymidine kinase cassette (*Pgk-Neo-SV40 polyA*) that was cloned in reverse orientation with respect to the targeting vector. A 2 kb *Pvu*II/*Not*I *Irx6* fragment was cloned as the 3' arm of the targeting construct. Following homologous recombination, a mutated *Irx6* allele was generated that had lost all of exon 1 and part of exon 2. (A) Construct used. (B) Southern blot of the targeted ES cell DNA, clone B3. Southern blot analysis for homologous recombinants was carried out following an *Xba*I digest using a 2 kb *Hind*III fragment probe 5' to the left arm of the targeting construct. The wild-type band size is 8.5 kb and the targeted band size is 10 kb. Two positive clones were used to give rise to the knock-in founder mice. (C) PCR showing wild-type, homozygous (*Irx6*<sup>lacZ/lacZ</sup>) and heterozygous (*Irx6*<sup>+ / lacZ</sup>) mice. *Irx6*<sup>+ / lacZ</sup> heterozygous crosses produced offspring (+/+, +/lacZ, lacZ/lacZ) with the expected Mendelian ratio and *Irx6*<sup>lacZ/lacZ</sup> mice were able to reproduce successfully. Both developing and adult *Irx6*<sup>lacZ/lacZ</sup> mice were indistinguishable from their wild-type littermates in terms of size and general behavior. (D) In situ hybridization (upper) for *Irx6* expression in the P0 *Irx6*<sup>+ / lacZ</sup> mouse retina and X-gal staining (lower) in an adjacent section showing the overlapping expression pattern between endogenous *Irx6* expression and expression of the *Irx6*: $\beta$ gal reporter. The riboprobe corresponds to the full-length cDNA for *Irx6*. The protocol for in situ hybridization has been previously described (Chow et al., 2001), except the hybridization temperature was 56°C.

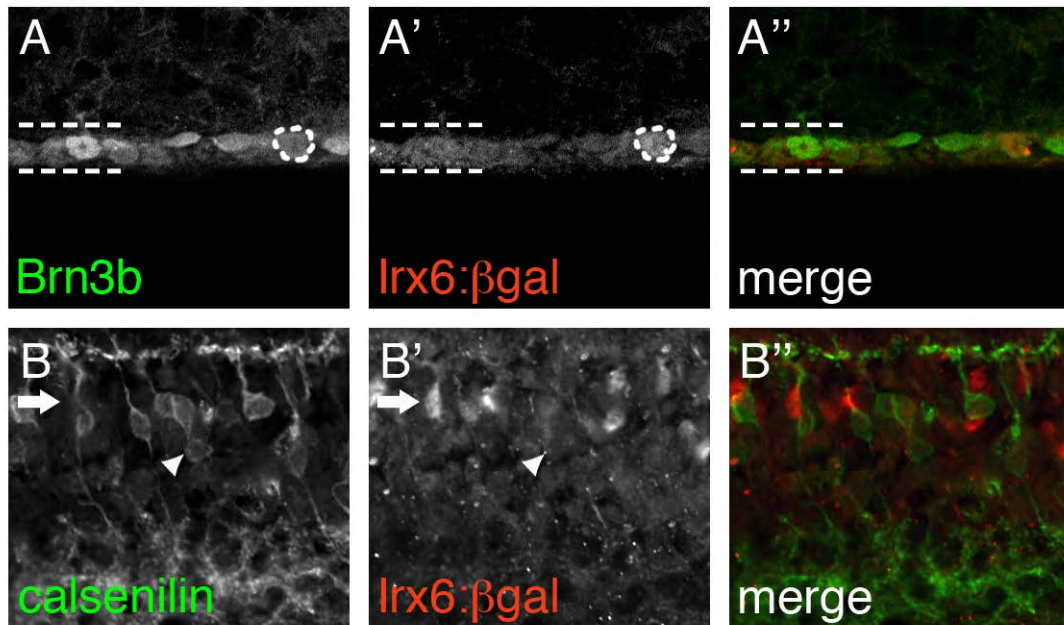

**Fig. S2. The *Irx6*: $\beta$ gal reporter is expressed in a subset of ganglion cells, but is not expressed in type 4 bipolar cells.** (A-A'') The *Irx6*: $\beta$ gal reporter co-immunolabels with the ganglion cell marker Brn3b in a subset of cells in the adult *Irx6*<sup>+/*lacZ*</sup> mouse retina. The dashed lines indicate the boundary of the ganglion cell layer. The outlined cell is both positive for Brn3b and *Irx6*: $\beta$ gal. (B-B'') In the adult *Irx6*<sup>+/*lacZ*</sup> mouse retina, the type 4 bipolar cell marker calsenilin does not co-immunolabel with *Irx6*: $\beta$ gal, indicating that *Irx6* is not expressed in type 4 OFF bipolar cells. The arrow indicates a cell that is positive for *Irx6*: $\beta$ gal, but not for calsenilin; the arrowhead indicates a calsenilin-positive cell that is negative for *Irx6*: $\beta$ gal.

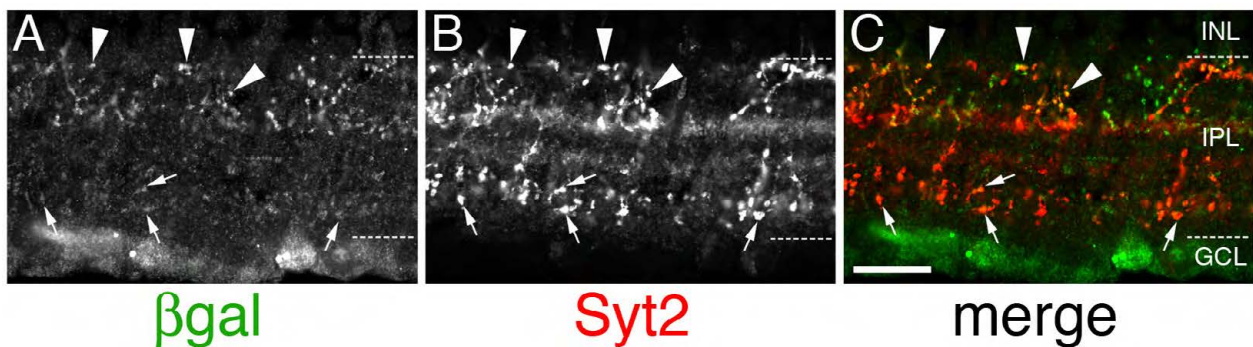

**Fig. S3. *Irx6*: $\beta$ gal is strongly expressed in the *Irx6*<sup>*lacZ/lacZ*</sup> mouse and can be visualized in the inner plexiform layer.** *Irx6*: $\beta$ gal (A) co-immunolabels with Synaptotagmin 2 (Syt2) (B,C) in both the upper and lower zones of the inner plexiform region, corresponding to the OFF and ON projecting regions. Other ON bipolar cells (type 5 or rod bipolar cells) do not show expression of the *Irx6*: $\beta$ gal reporter as all of the Cabp5-expressing cells that co-immunolabeled with *Irx6*: $\beta$ gal also expressed Hcn4. Scale bar 10  $\mu$ m.

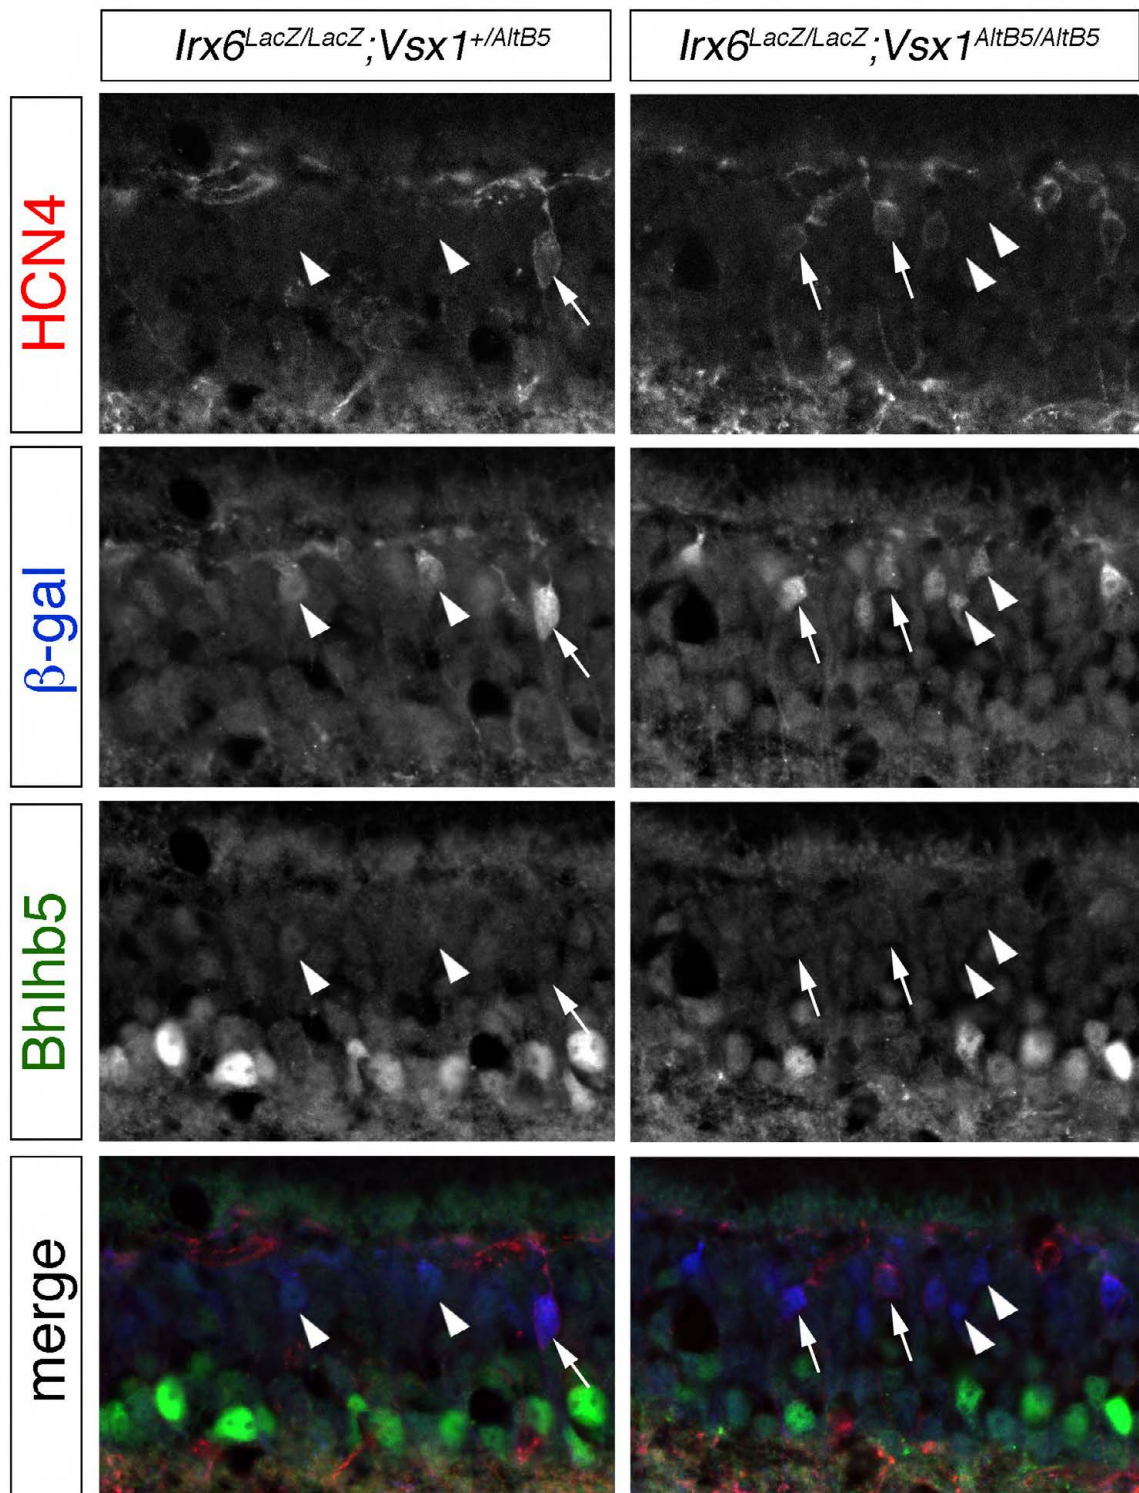

**Fig. S4.** In both the *Irx6<sup>lacZ/lacZ</sup>; Vsx1<sup>+/AltB5</sup>* and *Irx6<sup>lacZ/lacZ</sup>; Vsx1<sup>AltB5/AltB5</sup>* mouse, not all *Irx6*: $\beta$ gal-positive cells express Hcn4. Arrowheads indicate *Irx6*: $\beta$ gal-positive cells that do not express Hcn4 whereas arrows indicate *Irx6*: $\beta$ gal-positive cells that express Hcn4. Bhlhb5 immunolabeling is present in some of the *Irx6*: $\beta$ gal cells that do not co-immunolabel with Hcn4 in the *Irx6<sup>lacZ/lacZ</sup>; Vsx1<sup>+/AltB5</sup>* retina.

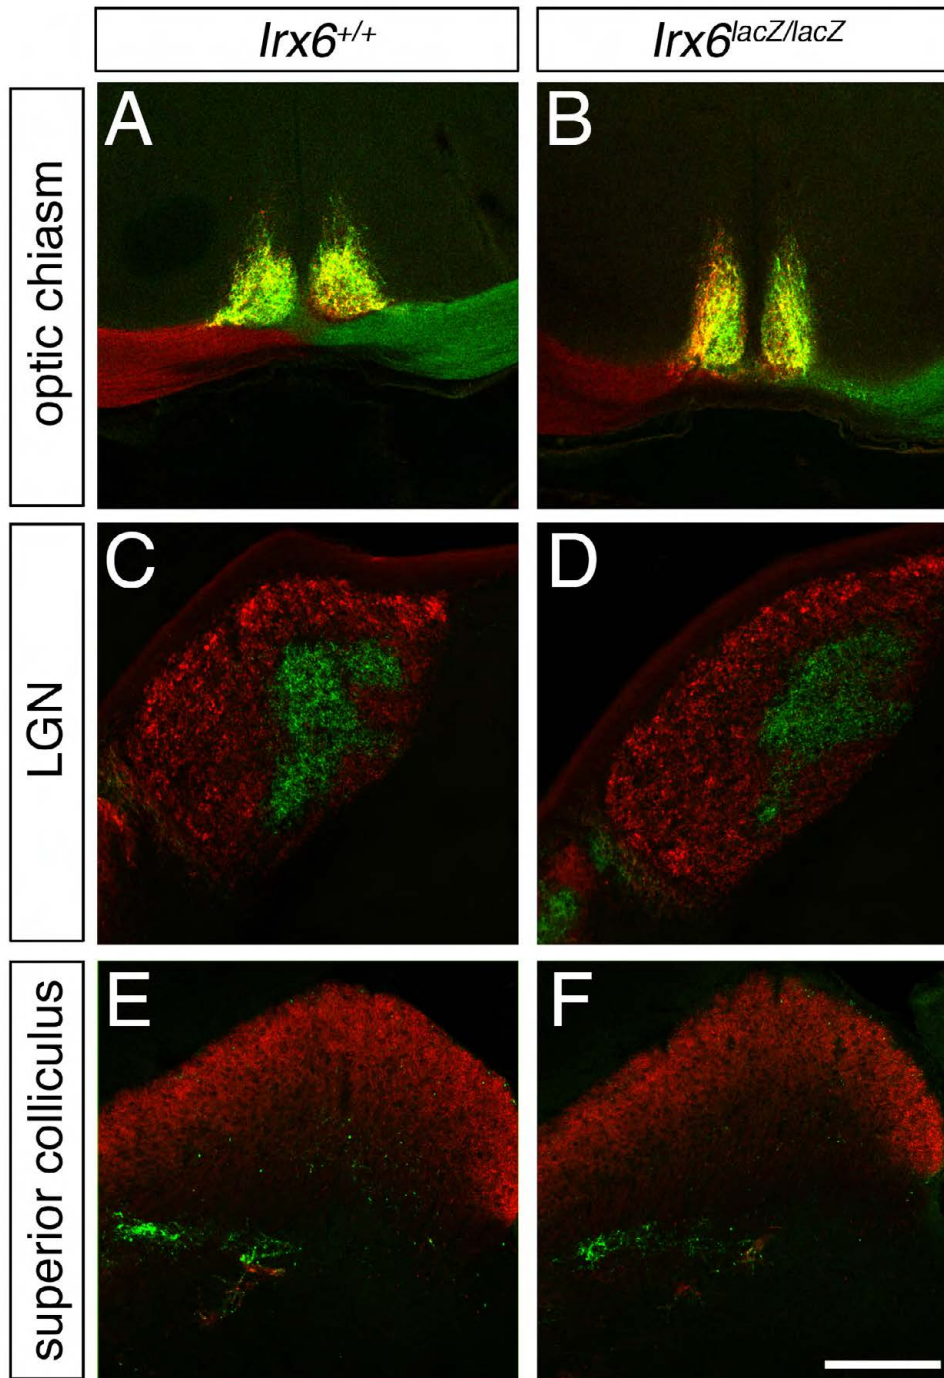

**Fig. S5. Ganglion cell projections to the brain are grossly normal in *Irx6*<sup>lacZ/lacZ</sup> mice.** As *Irx6* is expressed in a subset of retinal ganglion cells (supplementary material Fig. S2), we investigated whether *Irx6* is required for ganglion cell axon outgrowth, migration and targeting. Cholera toxin subunit B coupled to either Alexa Fluor 488 (left eye) or Alexa Fluor 555 (right eye) (Invitrogen), was injected into the intravitreal space of the eye (2  $\mu$ l, 5  $\mu$ g/ $\mu$ l per eye) using a 33G Hamilton needle at 2 months of age. After 24 hours, mice were euthanized and brain tissue fixed for 10 minutes with 4% paraformaldehyde in phosphate-buffered saline (PBS) by trans-cardial perfusion, followed by overnight fixation of tissue in 4% paraformaldehyde in PBS at 4°C. (**A,B**) The optic nerves carrying different dyes branched out contralaterally at the optical chiasm, with a subset of nerve fibers projecting ipsilaterally with no difference between *Irx6*<sup>+/lacZ</sup> (**A**) and *Irx6*<sup>lacZ/lacZ</sup> (**B**) mice. (**C,D**) In the lateral geniculate nucleus, nerves projecting contralaterally (red) and ipsilaterally (green) occupy distinct regions in a manner that was indistinguishable between control *Irx6*<sup>+/lacZ</sup> (**C**) and *Irx6*<sup>lacZ/lacZ</sup> (**D**) mice. (**E,F**) Similarly, in the superior colliculus, where most projections were formed contralaterally, no difference was observed between control *Irx6*<sup>+/lacZ</sup> (**E**) and *Irx6*<sup>lacZ/lacZ</sup> (**F**) mice. Scale bar: 100  $\mu$ m in A,B,E,F; 200  $\mu$ m in C,D.

**Table S1. Antibody dilutions and sources**

| Antigen         | Antiserum                                                                                                 | Source                                                                        | Working dilution <sup>5</sup>     |
|-----------------|-----------------------------------------------------------------------------------------------------------|-------------------------------------------------------------------------------|-----------------------------------|
| Vsx1            | Rabbit anti-Vsx1                                                                                          | R. L. Chow, University of Victoria, Victoria, BC                              | 1:100                             |
| Recoverin       | Rabbit anti-recoverin <sup>1</sup>                                                                        | Millipore/Chemicon (AB5585)                                                   | 1:500                             |
| NK3R            | 1. Rabbit anti-NK3R <sup>2</sup><br>2. Rabbit anti-NK3R <sup>3</sup>                                      | A. Hirano, Department of Neurobiology, Los Angeles, CA<br>Calbiochem (480739) | 1:500<br>1:5000                   |
| Cabp5           | Rabbit anti-Cabp5                                                                                         | F. Haeseleer, Department of Ophthalmology, Seattle, WA                        | 1:500                             |
| PKC $\alpha$    | Rabbit anti-PKC $\alpha$                                                                                  | Sigma (P4334)                                                                 | 1:20,000                          |
| Calbindin       | Mouse anti-calbindin                                                                                      | Sigma (C2724)                                                                 | 1:500                             |
| Chx10           | 1. Rabbit anti-Chx10<br>2. Sheep anti-Chx10                                                               | R. R. McInnes, Hospital for Sick Children, Toronto<br>Exalpha (X1180P)        | 1:500<br>1:1000                   |
| $\beta$ -Gal    | 1. Chicken anti- $\beta$ -Gal <sup>4</sup><br>2. Rabbit anti- $\beta$ -Gal<br>3. Mouse anti- $\beta$ -Gal | Abcam (ab9361)<br>Cappel (55976), MP<br>Biomedicals<br>Sigma (G8021)          | 1:300/1:12,500<br>1:5000<br>1:500 |
| Bhlhb5          | Goat anti- $\beta$ 3 (E17)                                                                                | Santa Cruz (sc-6045)                                                          | 1:1000                            |
| HCN4            | 1. Guinea pig anti-HCN4 $\gamma$<br>2. Rat anti-HCN4 $\gamma$ PG2-1A4                                     | F. Müller, Forschungszentrum, Jülich, Germany                                 | 1:500<br>1:1                      |
| Irx5            | Rabbit anti-Irx5                                                                                          | C. C. Hui, Hospital for Sick Children, Toronto                                | 1:50                              |
| PKA RII $\beta$ | Mouse anti-PKA RII $\beta$                                                                                | BD science (612550)                                                           | 1:3000                            |
| Calretinin      | Goat anti-calretinin                                                                                      | Chemicon (AB1559)                                                             | 1:2500                            |
| Brn3b           | Goat anti-Brn3b                                                                                           | Santa Cruz (sc-31989)                                                         | 1:100                             |
| Syntaxin        | Mouse anti-syntaxin                                                                                       | Sigma (S0664)                                                                 | 1:500                             |
| Calsenilin      | Mouse anti-calsenilin                                                                                     | W. Wasco, Harvard Medical School, Charlestown, MA<br>clone 40A5               | 1:2000                            |
| Synaptotagmin   | Mouse anti-Syt2/ZNP-1                                                                                     | Zebrafish International Resource Center                                       | 1:250                             |

<sup>1</sup>Labeling for recoverin was carried out using 0.1% Triton X-100 in place of Tween 20.

<sup>2</sup>Immunolabeling for NK3R was done in the absence of horse serum.

<sup>3</sup>Mice were perfused with 4% PFA prior to enucleation and the retina was then left in 4% PFA for 20 minutes at room temperature.

<sup>4</sup>Chicken anti- $\beta$ -gal shows some non-specific labeling of amacrine cells in this system

<sup>5</sup>Antibodies were diluted in PBS containing 1% horse serum and 0.1% Tween 20, except as noted above.

**Table S2. Vectors used**

| Vector                        | Host                                            | Reference to sequence number below <sup>‡</sup> or vector source | Putative Irx6-binding site (IBS)* |
|-------------------------------|-------------------------------------------------|------------------------------------------------------------------|-----------------------------------|
| pRecoverin_1461.luc           | pGL4.26<br><i>KpnI</i> and <i>HindIII</i> sites | 1                                                                | ACATGT                            |
| pVsx1_9130.luc                | pGL3P<br><i>SacI</i> and <i>BglIII</i> sites    | 2                                                                | ACACGTGT                          |
| pVsx1_3377.luc                | pGL3P<br><i>SacI</i> and <i>BglIII</i> sites    | 3                                                                | ACACGTGT                          |
| pVsx1_2232.luc                | pGL3P<br><i>SacI</i> and <i>BglIII</i> sites    | 4                                                                | ACATGTGT                          |
| pNK3R_1398.luc                | pGL3P<br><i>SacI</i> and <i>BglIII</i> sites    | 5                                                                | ACAGGTGT                          |
| plrx6                         | pBSK-EF1_<br><i>SfiI</i> and <i>XbaI</i> sites  | C. C. Hui,<br>Hospital for Sick<br>Children, Toronto             |                                   |
| plrx5                         | pBSK-EF1_<br><i>SfiI</i> and <i>XbaI</i> sites  | C. C. Hui,<br>Hospital for Sick<br>Children, Toronto             |                                   |
| Renilla                       | pRL-TK                                          | Promega                                                          |                                   |
| Luciferase with mini-promoter | pGL4.26                                         | Promega                                                          |                                   |
| Luciferase with SV40 promoter | pGL3P                                           | Promega                                                          |                                   |

\*Putative IBS identified using FIMO (<http://meme.nbcr.net/meme/intro.html>).

<sup>‡</sup>Appropriate restriction enzyme sites have been integrated into the primers and are found in the sequence below (primers are italicized and putative IBS is in bold).

1 . TGGTGAACAGTGCTGTGGATGTGCAAGCCAATCAAACCATTTTCCTCCTCAAGTTGC  
TTTTGCTCACGGTGCTCCACGGCAGCAATAGAAACCCTAACTAACACAAGCAGAGAACT  
AAGGCAGCCCATTCCTAGGCAGAAACGCAGGGGAAGATGGGAATACGTATGTAGTTCTT  
GGGGATGCCTTGAAAAAGAGAAATCCCAGTGTGTAAGGTCAGTATTGTATGGAGTACCA  
GGTAATAGGGTGGCATCAGAAGGAAGGGGTGGGGTTTGCTTTCTAAAACTTACTATACA  
CCCCAACAGTCCTCTAGTCTCTAAGGAAATGGCAGGGGCAGCTATGAATAACACATAAA  
CACAAACACAAAATGTATCTAAAATTACAACCCCTGAGACTACACTCAAATGACACATT  
CACCATTGCCAATGTGACAGGCCTCTCTGTCTCTTGCCACCTGCCTGGTCTGCCTGCTC  
ACTCCTCCTAGGCAGCTTTATTCTACCTTTGTTACTTAGGAACAATAACACCAGGGCTT  
AACTTATAATAGAGACTCACAAACGGACCCAGGTCCCCATGACCCAGTCTTGCCTTGAAC

ACACCATAAGTAA**ACATGT**ATAGAGCGCATCCAACACACTGAACTTTGTA ACTCAGGCT  
TACCCACCTCTGTCCGCTCAGA AACTCACGTTGGACAAAATCCCGGAGAAATAATCTC  
CTGTGGTTGTATAAGGCATGTTGTGGTACTGTGGTAAAGTCAAAACATTTAAACTGTGG  
TAGATCAAAACATTTAGGTGAGCCTATAGTGAGTCTGGAGCCGTGTTTGTGTGTGTGTG  
TGTGTGTGTT CAGCACCTTTTCCAGCCAGTTTGAGCTATTTTGTACTGTTCTGGCAGTG  
GAGATAACAACCCACAGAACAATCTTTCCCTATCTGGCACTTCCATTCTGGCAGACA  
GTTTGGGGTTTCCAGCAGCGGTGAGGAAGGAGCCATCAGAGAGTGATGGATAAAAGGT  
CTTGCTGAGAAGGTGAAGTGTCTAGGCCCAAATGTGACTGGGGGAGGATTAGAAAACT  
CCCATGCAGTGTAGGTTAAGTGGTAGGGCTGCCTTTAGACCCTAAGCTCCCAA ACTCCT  
GCACTATAAGGTCCCATGGGTGCCCTCAGATGGGGAGACAAACAGCAAGCAGTGTGGC  
TCTTCGGGGCTTAAATGCCGAGGATGCTTGGTTCAAGGGTCCCTCCTTGTTCTTTCT  
TCTCAACAAGCACAGGAAAGGTAAGTGGCTGCTCTTGGCTCTTTATTTAATCTCAGAA  
GGTGCCCCCTCCTCCCTCCAAGGACTGGGCAGACCTGGCCGCAAATCCCCCTAATCCA  
TCAGCACCTGGGT

\*\*\*a region containing more than 44% GT repeat and 20% TA repeat has been deleted from the above sequence.

2 . TACGAGCTCTTCCATAATCTGTCCATTGGTGAGAGTGGGGTGTGAAATCTCCC ACT  
ATTATTATGTAATGTTCAATGTGTGTTTTGAGCTTTAGTAATGTTTCTTTT**ACACGTGT**  
GGGTGCCCTTGCCATGGGGCATAACATGTTTAGAATTGAGAATCAATTTGGATTTTTC  
GTATGGTGGGTATGAATAAGATTTCCCATCTCTTTTGATAACTTTTGGTTGAAAGTCTA  
TTTTACTGGATATTAGAATGGCTACTTCAGCTTGTCTTAGATCTGTT

3 . TACGAGCTCAGTACTTGACGATGAGGTCCCTGGACACAAAGCTGGAGTCAGTGTCTG  
AGTATAGATT CATGGGAGGGTCGGATCTCAGAACAGAGGGATAGCAGAGAAGCAGGAGA  
AGGAGCCACGCAAAGTTGCCACTGCCTTATCCACGAATGGGGAGGAACTGGAAACAGAC  
ACTGCAATGTCTCCTTGAA**ACACGTGT**GTGACCTCTTAGTAACTCAGTGCTGAGACT  
CTGTTTTGTGGTTTTCTGTCTACGGAAGAACAATTGCCCCATCGAGGCAGGGTAAAA  
AGCCAGTCCATATTTATCTAGTACAAGGGTCCAAGAACGGAGTCTGAGTGGGACACCAA  
CAACCTGGGAAGGAGAAAGCAATGTGGAACGAGATCTGCGATCTG

4 . TACGAGCTCCGAATCTGATAATAGTTTGGCTTTTAGCTTTTCTTACCCTGAGATTTT  
TTGATATGTTGAATATGGGTAGATAACCTCACAGTTGAATGGTATTGTTTT CAGGGGAA  
TTTATACATTA CTGAG**ACATGTGT**GT CATGGGTGCACAAGCTTCTGGGCTATGTCTCT  
AGGATTCGTGCATCAGGGCAGGGTGAGTTTTGACAAAGATTTGATGTCACAAATCCTGC  
CTTAGATCTGTT

5 . TACGAGCTCCAACAGGCAGTAATGATCACATATTTATTTGATAAAAAAAAAATGTGTC  
TTTTTGAAATGCATTCTGCCTAATAGCATTGATTTCTTTTCCACTTTGTAAATAACTC  
CACCAAATCGTGGATGTGACAT**ACAGGTGT**TAGTTTTCTACTGACATGTGGTACTTA  
CTACATTATTAGCAATTCCTGAAAGCCTGTTTTGTTGCCTGAAAGACCACTTCTCTATC  
GTCATCGCCACCTTGATAACCAGATCCCAAGTGAAAGGTATAATTACTTCTTCTACCGA  
TCTGAATATCGTTATCTAGATCTGTT
